# Supplementary material
Source: publisher figshare collection journal article supplement (https://acs.figshare.com/ndownloader/files/5116303)
Supplement: Supplementary file 1 [file 5116303]

 
data_1
 
_audit_creation_method            SHELXL-97 
_chemical_name_systematic      
;
[(2S,4S,5R)-5-phenyl-4-(phenylsulfonyl)tetrahydro-2-furanyl]
methyl(1S,4R)-4,7,7-trimethyl-3-oxo-2-oxabicyclo
[2.2.1]heptane-1-carboxylate
; 


_chemical_name_common         
;   [(2S,4S,5R)-5-phenyl-4-(phenylsulfonyl)
tetrahydro-2-furanyl]methyl (-)-camphanate 
;
_chemical_melting_point           ? 
_chemical_formula_moiety          ? 
_chemical_formula_sum 
 'C27 H30 O7 S' 
_chemical_formula_weight          498.57 
 
loop_ 
 _atom_type_symbol 
 _atom_type_description 
 _atom_type_scat_dispersion_real 
 _atom_type_scat_dispersion_imag 
 _atom_type_scat_source 
 'C'  'C'   0.0033   0.0016 
 'International Tables Vol C Tables 4.2.6.8 and 6.1.1.4' 
 'H'  'H'   0.0000   0.0000 
 'International Tables Vol C Tables 4.2.6.8 and 6.1.1.4' 
 'O'  'O'   0.0106   0.0060 
 'International Tables Vol C Tables 4.2.6.8 and 6.1.1.4' 
 'S'  'S'   0.1246   0.1234 
 'International Tables Vol C Tables 4.2.6.8 and 6.1.1.4' 
 
_symmetry_cell_setting            Orthorombic 
_symmetry_space_group_name_H-M    P2(1)2(1)2(1) 
 
loop_ 
 _symmetry_equiv_pos_as_xyz 
 'x, y, z' 
 '-x+1/2, -y, z+1/2' 
 '-x, y+1/2, -z+1/2' 
 'x+1/2, -y+1/2, -z' 
 
_cell_length_a                    6.4186(10) 
_cell_length_b                    11.8863(13) 
_cell_length_c                    31.835(3) 
_cell_angle_alpha                 90.00 
_cell_angle_beta                  90.00 
_cell_angle_gamma                 90.00 
_cell_volume                      2428.8(5) 
_cell_formula_units_Z             4 
_cell_measurement_temperature     150(2) 
_cell_measurement_reflns_used     ? 
_cell_measurement_theta_min       ? 
_cell_measurement_theta_max       ? 
 
_exptl_crystal_description        ? 
_exptl_crystal_colour             ? 
_exptl_crystal_size_max           0.15
_exptl_crystal_size_mid           0.15
_exptl_crystal_size_min           0.15
_exptl_crystal_density_meas       ? 
_exptl_crystal_density_diffrn     1.363 
_exptl_crystal_density_method     'not measured' 
_exptl_crystal_F_000              1056 
_exptl_absorpt_coefficient_mu     0.179 
_exptl_absorpt_correction_type    ? 
_exptl_absorpt_correction_T_min   ? 
_exptl_absorpt_correction_T_max   ? 
_exptl_absorpt_process_details    ? 
 
_exptl_special_details 
; 
 ? 
; 
 
_diffrn_ambient_temperature       150(2) 
_diffrn_radiation_wavelength      0.71073 
_diffrn_radiation_type            MoK\a 
_diffrn_radiation_source          'fine-focus sealed tube' 
_diffrn_radiation_monochromator   graphite 
_diffrn_measurement_device_type   ? 
_diffrn_measurement_method        ? 
_diffrn_detector_area_resol_mean  ? 
_diffrn_standards_number          ? 
_diffrn_standards_interval_count  ? 
_diffrn_standards_interval_time   ? 
_diffrn_standards_decay_%         ? 
_diffrn_reflns_number             37435 
_diffrn_reflns_av_R_equivalents   0.0965 
_diffrn_reflns_av_sigmaI/netI     0.0611 
_diffrn_reflns_limit_h_min        -7 
_diffrn_reflns_limit_h_max        7 
_diffrn_reflns_limit_k_min        -14 
_diffrn_reflns_limit_k_max        14 
_diffrn_reflns_limit_l_min        -37 
_diffrn_reflns_limit_l_max        37 
_diffrn_reflns_theta_min          3.49 
_diffrn_reflns_theta_max          25.00 
_reflns_number_total              4256 
_reflns_number_gt                 3520 
_reflns_threshold_expression      >2sigma(I) 
 
_computing_data_collection        ? 
_computing_cell_refinement        ? 
_computing_data_reduction         ? 
_computing_structure_solution     'SHELXS-97 (Sheldrick, 1990)' 
_computing_structure_refinement   'SHELXL-97 (Sheldrick, 1997)' 
_computing_molecular_graphics     ? 
_computing_publication_material   ? 
 
_refine_special_details 
; 
 Refinement of F^2^ against ALL reflections.  The weighted R-factor wR and 
 goodness of fit S are based on F^2^, conventional R-factors R are based 
 on F, with F set to zero for negative F^2^. The threshold expression of 
 F^2^ > 2sigma(F^2^) is used only for calculating R-factors(gt) etc. and is 
 not relevant to the choice of reflections for refinement.  R-factors based 
 on F^2^ are statistically about twice as large as those based on F, and R- 
 factors based on ALL data will be even larger. 
; 
 
_refine_ls_structure_factor_coef  Fsqd  
_refine_ls_matrix_type            full 
_refine_ls_weighting_scheme       calc  
_refine_ls_weighting_details 
 'calc w=1/[\s^2^(Fo^2^)+(0.0316P)^2^+0.0000P] where P=(Fo^2^+2Fc^2^)/3' 
_atom_sites_solution_primary      direct 
_atom_sites_solution_secondary    difmap 
_atom_sites_solution_hydrogens    geom 
_refine_ls_hydrogen_treatment     mixed 
_refine_ls_extinction_method      SHELXL 
_refine_ls_extinction_coef        0.0089(8) 
_refine_ls_extinction_expression 
 'Fc^*^=kFc[1+0.001xFc^2^\l^3^/sin(2\q)]^-1/4^' 
_refine_ls_abs_structure_details 
 'Flack H D (1983), Acta Cryst. A39, 876-881' 
_refine_ls_abs_structure_Flack    0.05(7) 
_refine_ls_number_reflns          4256 
_refine_ls_number_parameters      320 
_refine_ls_number_restraints      0 
_refine_ls_R_factor_all           0.0520 
_refine_ls_R_factor_gt            0.0383 
_refine_ls_wR_factor_ref          0.0718 
_refine_ls_wR_factor_gt           0.0676 
_refine_ls_goodness_of_fit_ref    0.962 
_refine_ls_restrained_S_all       0.962 
_refine_ls_shift/su_max           0.001 
_refine_ls_shift/su_mean          0.000 
 
loop_ 
 _atom_site_label 
 _atom_site_type_symbol 
 _atom_site_fract_x 
 _atom_site_fract_y 
 _atom_site_fract_z 
 _atom_site_U_iso_or_equiv 
 _atom_site_adp_type 
 _atom_site_occupancy 
 _atom_site_symmetry_multiplicity 
 _atom_site_calc_flag 
 _atom_site_refinement_flags 
 _atom_site_disorder_assembly 
 _atom_site_disorder_group 
S1 S 0.85029(10) 0.52020(5) 0.982623(19) 0.02637(17) Uani 1 1 d . . . 
C2 C 0.7155(4) 0.58413(19) 0.90229(7) 0.0216(6) Uani 1 1 d . . . 
H2 H 0.8685 0.5698 0.8996 0.026 Uiso 1 1 calc R . . 
C3 C 0.6487(4) 0.57438(19) 0.94902(7) 0.0210(5) Uani 1 1 d . . . 
H3 H 0.5251 0.5234 0.9508 0.025 Uiso 1 1 calc R . . 
C4 C 0.5821(4) 0.69278(19) 0.96236(7) 0.0256(6) Uani 1 1 d . . . 
H4A H 0.4293 0.6966 0.9664 0.031 Uiso 1 1 calc R . . 
H4B H 0.6515 0.7149 0.9889 0.031 Uiso 1 1 calc R . . 
C5 C 0.6506(4) 0.76867(19) 0.92627(7) 0.0230(6) Uani 1 1 d . . . 
H5 H 0.5385 0.8252 0.9208 0.028 Uiso 1 1 calc R . . 
C6 C 0.8501(4) 0.8298(2) 0.93501(7) 0.0259(6) Uani 1 1 d . . . 
H6A H 0.8317 0.8818 0.9590 0.031 Uiso 1 1 calc R . . 
H6B H 0.9615 0.7754 0.9422 0.031 Uiso 1 1 calc R . . 
C8 C 1.0490(4) 0.8448(2) 0.87285(8) 0.0287(6) Uani 1 1 d . . . 
C11 C 1.0728(4) 0.9017(2) 0.83094(7) 0.0212(6) Uani 1 1 d . . . 
C13 C 1.0189(4) 1.0663(2) 0.79699(8) 0.0288(6) Uani 1 1 d . . . 
C15 C 1.2021(3) 1.0045(2) 0.77856(7) 0.0246(6) Uani 1 1 d . . . 
C16 C 1.0991(4) 0.9022(2) 0.75659(8) 0.0336(7) Uani 1 1 d . . . 
H16A H 0.9826 0.9265 0.7384 0.040 Uiso 1 1 calc R . . 
H16B H 1.2019 0.8607 0.7394 0.040 Uiso 1 1 calc R . . 
C17 C 1.0192(4) 0.8286(2) 0.79307(8) 0.0322(7) Uani 1 1 d . . . 
H17A H 0.8673 0.8154 0.7909 0.039 Uiso 1 1 calc R . . 
H17B H 1.0925 0.7554 0.7941 0.039 Uiso 1 1 calc R . . 
C18 C 1.2877(4) 0.95022(19) 0.81968(8) 0.0223(6) Uani 1 1 d . . . 
C19 C 1.3666(4) 1.0355(2) 0.85182(8) 0.0354(7) Uani 1 1 d . . . 
H19A H 1.3866 0.9981 0.8790 0.053 Uiso 1 1 calc R . . 
H19B H 1.2644 1.0962 0.8549 0.053 Uiso 1 1 calc R . . 
H19C H 1.4995 1.0669 0.8422 0.053 Uiso 1 1 calc R . . 
C20 C 1.4573(4) 0.8626(2) 0.81180(9) 0.0348(7) Uani 1 1 d . . . 
H20A H 1.5844 0.9003 0.8021 0.052 Uiso 1 1 calc R . . 
H20B H 1.4099 0.8094 0.7903 0.052 Uiso 1 1 calc R . . 
H20C H 1.4865 0.8219 0.8379 0.052 Uiso 1 1 calc R . . 
C21 C 1.3443(4) 1.0746(2) 0.75176(8) 0.0393(7) Uani 1 1 d . . . 
H21A H 1.2644 1.1082 0.7287 0.059 Uiso 1 1 calc R . . 
H21B H 1.4548 1.0269 0.7402 0.059 Uiso 1 1 calc R . . 
H21C H 1.4064 1.1344 0.7689 0.059 Uiso 1 1 calc R . . 
C22 C 0.5965(4) 0.50490(19) 0.87376(7) 0.0211(6) Uani 1 1 d . . . 
C23 C 0.6803(4) 0.4049(2) 0.86000(7) 0.0261(6) Uani 1 1 d . . . 
H23\ H 0.8196 0.3861 0.8672 0.031 Uiso 1 1 calc R . . 
C24 C 0.5630(4) 0.3310(2) 0.83566(7) 0.0289(6) Uani 1 1 d . . . 
H24 H 0.6219 0.2617 0.8267 0.035 Uiso 1 1 calc R . . 
C25 C 0.3623(4) 0.3581(2) 0.82449(8) 0.0304(6) Uani 1 1 d . . . 
H25 H 0.2819 0.3077 0.8079 0.036 Uiso 1 1 calc R . . 
C26 C 0.2789(4) 0.4594(2) 0.83762(8) 0.0303(6) Uani 1 1 d . . . 
H26 H 0.1411 0.4790 0.8296 0.036 Uiso 1 1 calc R . . 
C27 C 0.3929(4) 0.5322(2) 0.86221(7) 0.0258(6) Uani 1 1 d . . . 
H27 H 0.3329 0.6011 0.8713 0.031 Uiso 1 1 calc R . . 
C28 C 0.8929(4) 0.3834(2) 0.96232(7) 0.0258(6) Uani 1 1 d . . . 
C29 C 1.0756(4) 0.3612(2) 0.94122(8) 0.0300(7) Uani 1 1 d . . . 
H29 H 1.1800 0.4174 0.9385 0.036 Uiso 1 1 calc R . . 
C30 C 1.1039(5) 0.2549(2) 0.92406(8) 0.0358(7) Uani 1 1 d . . . 
H30 H 1.2303 0.2375 0.9099 0.043 Uiso 1 1 calc R . . 
C31 C 0.9505(5) 0.1748(2) 0.92736(8) 0.0395(8) Uani 1 1 d . . . 
H31 H 0.9696 0.1031 0.9147 0.047 Uiso 1 1 calc R . . 
C32 C 0.7692(5) 0.1978(2) 0.94889(8) 0.0385(7) Uani 1 1 d . . . 
H32 H 0.6653 0.1413 0.9515 0.046 Uiso 1 1 calc R . . 
C33 C 0.7375(4) 0.3027(2) 0.96667(8) 0.0305(6) Uani 1 1 d . . . 
H33 H 0.6126 0.3192 0.9815 0.037 Uiso 1 1 calc R . . 
O1 O 0.6699(3) 0.69712(13) 0.89025(5) 0.0259(4) Uani 1 1 d . . . 
O7 O 0.9062(2) 0.89231(13) 0.89756(5) 0.0240(4) Uani 1 1 d . . . 
O9 O 1.1522(3) 0.76478(15) 0.88243(6) 0.0517(6) Uani 1 1 d . . . 
O12 O 0.9387(2) 1.00140(14) 0.82839(5) 0.0257(4) Uani 1 1 d . . . 
O14 O 0.9404(3) 1.15401(16) 0.78744(6) 0.0463(6) Uani 1 1 d . . . 
O34 O 1.0378(3) 0.58495(13) 0.97668(5) 0.0334(5) Uani 1 1 d . . . 
O35 O 0.7640(3) 0.51181(14) 1.02417(5) 0.0374(5) Uani 1 1 d . . . 
 
loop_ 
 _atom_site_aniso_label 
 _atom_site_aniso_U_11 
 _atom_site_aniso_U_22 
 _atom_site_aniso_U_33 
 _atom_site_aniso_U_23 
 _atom_site_aniso_U_13 
 _atom_site_aniso_U_12 
S1 0.0397(4) 0.0189(3) 0.0205(3) -0.0003(3) -0.0050(3) 0.0011(3) 
C2 0.0246(14) 0.0216(14) 0.0186(13) 0.0043(11) -0.0002(11) -0.0009(11) 
C3 0.0228(13) 0.0222(13) 0.0180(12) 0.0004(11) 0.0008(11) -0.0031(12) 
C4 0.0275(14) 0.0232(14) 0.0262(14) -0.0010(12) 0.0043(12) 0.0003(11) 
C5 0.0289(14) 0.0185(13) 0.0215(14) -0.0011(11) 0.0015(12) 0.0019(12) 
C6 0.0375(16) 0.0210(13) 0.0193(13) 0.0042(11) 0.0011(13) -0.0024(13) 
C8 0.0268(15) 0.0214(14) 0.0380(16) 0.0001(13) 0.0057(13) 0.0013(13) 
C11 0.0237(13) 0.0161(12) 0.0236(14) 0.0008(11) 0.0033(11) 0.0041(11) 
C13 0.0349(16) 0.0292(16) 0.0223(14) 0.0054(13) 0.0011(12) 0.0087(13) 
C15 0.0279(15) 0.0231(14) 0.0229(13) 0.0014(11) 0.0023(11) 0.0019(12) 
C16 0.0372(17) 0.0374(16) 0.0264(15) -0.0076(13) -0.0038(13) 0.0055(14) 
C17 0.0265(15) 0.0298(15) 0.0404(17) -0.0081(14) 0.0014(13) -0.0010(13) 
C18 0.0216(14) 0.0192(13) 0.0261(14) -0.0004(11) 0.0018(11) 0.0006(10) 
C19 0.0357(15) 0.0349(16) 0.0358(15) -0.0031(13) -0.0015(14) -0.0055(14) 
C20 0.0217(15) 0.0362(16) 0.0465(17) 0.0067(14) 0.0040(13) 0.0078(13) 
C21 0.0523(19) 0.0324(15) 0.0331(16) 0.0050(13) 0.0163(15) 0.0062(15) 
C22 0.0245(14) 0.0237(14) 0.0152(11) 0.0030(11) 0.0027(10) -0.0006(11) 
C23 0.0273(14) 0.0261(14) 0.0250(14) 0.0016(12) 0.0019(12) 0.0024(12) 
C24 0.0408(17) 0.0211(14) 0.0249(14) -0.0033(12) 0.0062(13) 0.0011(13) 
C25 0.0364(16) 0.0298(15) 0.0251(14) -0.0026(12) -0.0011(13) -0.0112(14) 
C26 0.0271(14) 0.0364(16) 0.0272(14) -0.0026(13) -0.0033(12) -0.0023(12) 
C27 0.0277(15) 0.0241(14) 0.0255(14) -0.0037(11) 0.0000(11) 0.0021(12) 
C28 0.0395(17) 0.0196(13) 0.0182(13) 0.0011(11) -0.0022(12) 0.0018(12) 
C29 0.0353(16) 0.0265(15) 0.0284(15) 0.0008(12) -0.0019(13) 0.0001(13) 
C30 0.048(2) 0.0295(16) 0.0300(16) 0.0011(13) 0.0031(14) 0.0088(15) 
C31 0.067(2) 0.0211(15) 0.0304(16) -0.0036(13) -0.0005(16) 0.0080(16) 
C32 0.061(2) 0.0222(15) 0.0320(16) 0.0017(13) 0.0036(16) -0.0065(14) 
C33 0.0407(16) 0.0246(14) 0.0263(14) 0.0008(12) 0.0046(13) -0.0001(13) 
O1 0.0392(11) 0.0188(9) 0.0196(9) 0.0014(7) -0.0034(9) -0.0014(8) 
O7 0.0295(10) 0.0199(9) 0.0227(9) 0.0015(8) 0.0045(8) -0.0007(8) 
O9 0.0551(13) 0.0424(12) 0.0577(14) 0.0264(11) 0.0257(12) 0.0280(11) 
O12 0.0261(9) 0.0227(9) 0.0283(9) 0.0035(8) 0.0045(7) 0.0073(8) 
O14 0.0559(13) 0.0383(12) 0.0448(12) 0.0180(10) 0.0141(11) 0.0203(11) 
O34 0.0375(10) 0.0249(10) 0.0378(11) 0.0014(9) -0.0126(9) -0.0055(9) 
O35 0.0636(12) 0.0314(10) 0.0172(9) 0.0003(8) -0.0011(9) 0.0059(9) 
 
_geom_special_details 
; 
 All esds (except the esd in the dihedral angle between two l.s. planes) 
 are estimated using the full covariance matrix.  The cell esds are taken 
 into account individually in the estimation of esds in distances, angles 
 and torsion angles; correlations between esds in cell parameters are only 
 used when they are defined by crystal symmetry.  An approximate (isotropic) 
 treatment of cell esds is used for estimating esds involving l.s. planes. 
; 
 
loop_ 
 _geom_bond_atom_site_label_1 
 _geom_bond_atom_site_label_2 
 _geom_bond_distance 
 _geom_bond_site_symmetry_2 
 _geom_bond_publ_flag 
S1 O35 1.4373(17) . ? 
S1 O34 1.4409(17) . ? 
S1 C28 1.771(2) . ? 
S1 C3 1.798(2) . ? 
C2 O1 1.427(3) . ? 
C2 C22 1.515(3) . ? 
C2 C3 1.553(3) . ? 
C3 C4 1.531(3) . ? 
C4 C5 1.526(3) . ? 
C5 O1 1.433(3) . ? 
C5 C6 1.498(3) . ? 
C6 O7 1.451(3) . ? 
C8 O9 1.199(3) . ? 
C8 O7 1.333(3) . ? 
C8 C11 1.503(3) . ? 
C11 O12 1.467(3) . ? 
C11 C17 1.525(3) . ? 
C11 C18 1.537(3) . ? 
C13 O14 1.197(3) . ? 
C13 O12 1.363(3) . ? 
C13 C15 1.505(3) . ? 
C15 C21 1.501(3) . ? 
C15 C16 1.552(3) . ? 
C15 C18 1.560(3) . ? 
C16 C17 1.541(3) . ? 
C18 C19 1.527(3) . ? 
C18 C20 1.528(3) . ? 
C22 C23 1.376(3) . ? 
C22 C27 1.396(3) . ? 
C23 C24 1.392(3) . ? 
C24 C25 1.374(4) . ? 
C25 C26 1.382(3) . ? 
C26 C27 1.378(3) . ? 
C28 C29 1.377(3) . ? 
C28 C33 1.391(3) . ? 
C29 C30 1.388(3) . ? 
C30 C31 1.374(4) . ? 
C31 C32 1.378(4) . ? 
C32 C33 1.385(3) . ? 
 
loop_ 
 _geom_angle_atom_site_label_1 
 _geom_angle_atom_site_label_2 
 _geom_angle_atom_site_label_3 
 _geom_angle 
 _geom_angle_site_symmetry_1 
 _geom_angle_site_symmetry_3 
 _geom_angle_publ_flag 
O35 S1 O34 118.66(11) . . ? 
O35 S1 C28 109.37(11) . . ? 
O34 S1 C28 108.26(12) . . ? 
O35 S1 C3 107.16(11) . . ? 
O34 S1 C3 109.36(11) . . ? 
C28 S1 C3 102.88(11) . . ? 
O1 C2 C22 108.70(18) . . ? 
O1 C2 C3 105.71(18) . . ? 
C22 C2 C3 112.88(18) . . ? 
C4 C3 C2 105.92(18) . . ? 
C4 C3 S1 111.42(16) . . ? 
C2 C3 S1 113.46(16) . . ? 
C5 C4 C3 104.73(18) . . ? 
O1 C5 C6 111.2(2) . . ? 
O1 C5 C4 106.06(18) . . ? 
C6 C5 C4 113.1(2) . . ? 
O7 C6 C5 107.93(19) . . ? 
O9 C8 O7 124.4(2) . . ? 
O9 C8 C11 121.8(2) . . ? 
O7 C8 C11 113.8(2) . . ? 
O12 C11 C8 110.64(19) . . ? 
O12 C11 C17 106.51(18) . . ? 
C8 C11 C17 115.0(2) . . ? 
O12 C11 C18 102.13(17) . . ? 
C8 C11 C18 117.8(2) . . ? 
C17 C11 C18 103.39(19) . . ? 
O14 C13 O12 121.3(2) . . ? 
O14 C13 C15 130.8(2) . . ? 
O12 C13 C15 107.8(2) . . ? 
C21 C15 C13 115.2(2) . . ? 
C21 C15 C16 116.0(2) . . ? 
C13 C15 C16 103.0(2) . . ? 
C21 C15 C18 119.5(2) . . ? 
C13 C15 C18 98.61(18) . . ? 
C16 C15 C18 101.75(19) . . ? 
C17 C16 C15 104.31(19) . . ? 
C11 C17 C16 101.40(19) . . ? 
C19 C18 C20 109.0(2) . . ? 
C19 C18 C11 113.0(2) . . ? 
C20 C18 C11 114.95(19) . . ? 
C19 C18 C15 113.86(19) . . ? 
C20 C18 C15 113.3(2) . . ? 
C11 C18 C15 92.01(17) . . ? 
C23 C22 C27 118.9(2) . . ? 
C23 C22 C2 122.1(2) . . ? 
C27 C22 C2 119.0(2) . . ? 
C22 C23 C24 120.7(2) . . ? 
C25 C24 C23 120.2(2) . . ? 
C24 C25 C26 119.3(2) . . ? 
C27 C26 C25 120.9(2) . . ? 
C26 C27 C22 120.1(2) . . ? 
C29 C28 C33 121.8(2) . . ? 
C29 C28 S1 119.1(2) . . ? 
C33 C28 S1 119.1(2) . . ? 
C28 C29 C30 118.6(3) . . ? 
C31 C30 C29 120.5(3) . . ? 
C30 C31 C32 120.4(3) . . ? 
C31 C32 C33 120.4(3) . . ? 
C32 C33 C28 118.4(3) . . ? 
C2 O1 C5 111.19(16) . . ? 
C8 O7 C6 116.01(19) . . ? 
C13 O12 C11 106.03(17) . . ? 
 
_diffrn_measured_fraction_theta_max    0.993 
_diffrn_reflns_theta_full              25.00 
_diffrn_measured_fraction_theta_full   0.993 
_refine_diff_density_max    0.189 
_refine_diff_density_min   -0.227 
_refine_diff_density_rms    0.044 

#===END
 
data_2
 
_audit_creation_method            SHELXL-97
_chemical_name_systematic      
;[(2S,4R,5S)-5-phenyl-4-(phenylsulfonyl)tetrahydro-2-furanyl]
methyl (1S,4R)-4,7,7-trimethyl-3-oxo-2-oxabicyclo[2.2.1]
heptane-1-carboxylate
;

_chemical_name_common   
;[(2S,4R,5S)-5-phenyl-4-(phenylsulfonyl)
tetrahydro-2-furanyl]methyl (-)-camphanate
;
_chemical_melting_point           ?
_chemical_formula_moiety          ?
_chemical_formula_sum
 'C27 H30 O7 S'
_chemical_formula_weight          498.57
 
loop_
 _atom_type_symbol
 _atom_type_description
 _atom_type_scat_dispersion_real
 _atom_type_scat_dispersion_imag
 _atom_type_scat_source
 'C'  'C'   0.0181   0.0091
 'International Tables Vol C Tables 4.2.6.8 and 6.1.1.4'
 'H'  'H'   0.0000   0.0000
 'International Tables Vol C Tables 4.2.6.8 and 6.1.1.4'
 'O'  'O'   0.0492   0.0322
 'International Tables Vol C Tables 4.2.6.8 and 6.1.1.4'
 'S'  'S'   0.3331   0.5567
 'International Tables Vol C Tables 4.2.6.8 and 6.1.1.4'
 
_symmetry_cell_setting            orthorhombic
_symmetry_space_group_name_H-M    P212121
 
loop_
 _symmetry_equiv_pos_as_xyz
 'x, y, z'
 '-x+1/2, -y, z+1/2'
 'x+1/2, -y+1/2, -z'
 '-x, y+1/2, -z+1/2'
 
_cell_length_a                    6.0067(4)
_cell_length_b                    11.6597(10)
_cell_length_c                    35.632(5)
_cell_angle_alpha                 90.00
_cell_angle_beta                  90.00
_cell_angle_gamma                 90.00
_cell_volume                      2495.6(4)
_cell_formula_units_Z             4
_cell_measurement_temperature     293(2)
_cell_measurement_reflns_used     25
_cell_measurement_theta_min       22.11
_cell_measurement_theta_max       42.22
 
_exptl_crystal_description        plate
_exptl_crystal_colour             ?
_exptl_crystal_size_max           0.67
_exptl_crystal_size_mid           0.35
_exptl_crystal_size_min           0.17
_exptl_crystal_density_meas       ?
_exptl_crystal_density_diffrn     1.327
_exptl_crystal_density_method     'not measured'
_exptl_crystal_F_000              1056
_exptl_absorpt_coefficient_mu     1.530
_exptl_absorpt_correction_type    psi-scan
_exptl_absorpt_correction_T_min   0.8589
_exptl_absorpt_correction_T_max   0.9946
_exptl_absorpt_process_details    ?
 
_exptl_special_details
;
 ?
;
 
_diffrn_ambient_temperature       293(2)
_diffrn_radiation_wavelength      1.54184
_diffrn_radiation_type            CuK\a
_diffrn_radiation_source          'fine-focus sealed tube'
_diffrn_radiation_monochromator   graphite
_diffrn_measurement_device_type   'Enraf Nonius TurboCAD4'
_diffrn_measurement_method        'non-profiled omega/2theta scans'
_diffrn_detector_area_resol_mean  ?
_diffrn_standards_number          3
_diffrn_standards_interval_count  120
_diffrn_standards_interval_time   7200
_diffrn_standards_decay_%         1.02
_diffrn_reflns_number             5641
_diffrn_reflns_av_R_equivalents   0.0488
_diffrn_reflns_av_sigmaI/netI     0.0999
_diffrn_reflns_limit_h_min        -7
_diffrn_reflns_limit_h_max        6
_diffrn_reflns_limit_k_min        -14
_diffrn_reflns_limit_k_max        14
_diffrn_reflns_limit_l_min        -44
_diffrn_reflns_limit_l_max        44
_diffrn_reflns_theta_min          2.48
_diffrn_reflns_theta_max          74.21
_reflns_number_total              4890
_reflns_number_gt                 3004
_reflns_threshold_expression      >2sigma(I)
 
_computing_data_collection       'CAD4 Express (Enraf Nonius, 1994)'
_computing_cell_refinement       'CAD4 Express (Enraf Nonius, 1994)'
_computing_data_reduction        'XCAD4 (Harms & Wocadlo, 1995)'
_computing_structure_solution     'SHELXS97 in WINGX'
_computing_structure_refinement   'SHELXL-97 (Sheldrick, 1997)'
_computing_molecular_graphics     ?
_computing_publication_material   ?
 
_refine_special_details
;
 Refinement of F^2^ against ALL reflections.  The weighted R-factor wR and
 goodness of fit S are based on F^2^, conventional R-factors R are based
 on F, with F set to zero for negative F^2^. The threshold expression of
 F^2^ > 2sigma(F^2^) is used only for calculating R-factors(gt) etc. and is
 not relevant to the choice of reflections for refinement.  R-factors based
 on F^2^ are statistically about twice as large as those based on F, and R-
 factors based on ALL data will be even larger.
;
 
_refine_ls_structure_factor_coef  Fsqd
_refine_ls_matrix_type            full
_refine_ls_weighting_scheme       calc
_refine_ls_weighting_details
 'calc w=1/[\s^2^(Fo^2^)+(0.0702P)^2^+0.0000P] where P=(Fo^2^+2Fc^2^)/3'
_atom_sites_solution_primary      direct
_atom_sites_solution_secondary    difmap
_atom_sites_solution_hydrogens    geom
_refine_ls_hydrogen_treatment     mixed
_refine_ls_extinction_method      SHELXL
_refine_ls_extinction_coef        0.0024(3)
_refine_ls_extinction_expression
 'Fc^*^=kFc[1+0.001xFc^2^\l^3^/sin(2\q)]^-1/4^'
_refine_ls_abs_structure_details
 'Flack H D (1983), Acta Cryst. A39, 876-881'
_refine_ls_abs_structure_Flack    0.05(3)
_refine_ls_number_reflns          4890
_refine_ls_number_parameters      317
_refine_ls_number_restraints      0
_refine_ls_R_factor_all           0.1378
_refine_ls_R_factor_gt            0.0553
_refine_ls_wR_factor_ref          0.1545
_refine_ls_wR_factor_gt           0.1235
_refine_ls_goodness_of_fit_ref    1.025
_refine_ls_restrained_S_all       1.025
_refine_ls_shift/su_max           0.013
_refine_ls_shift/su_mean          0.001
 
loop_
 _atom_site_label
 _atom_site_type_symbol
 _atom_site_fract_x
 _atom_site_fract_y
 _atom_site_fract_z
 _atom_site_U_iso_or_equiv
 _atom_site_adp_type
 _atom_site_occupancy
 _atom_site_symmetry_multiplicity
 _atom_site_calc_flag
 _atom_site_refinement_flags
 _atom_site_disorder_assembly
 _atom_site_disorder_group
C2 C 0.1125(7) 1.4129(3) 0.59493(10) 0.0371(10) Uani 1 1 d . . .
H2 H -0.0332 1.4487 0.5989 0.045 Uiso 1 1 calc R . .
C3 C 0.1672(7) 1.4158(4) 0.55271(10) 0.0388(10) Uani 1 1 d . . .
H3 H 0.3032 1.4605 0.5486 0.047 Uiso 1 1 calc R . .
C4 C 0.2087(8) 1.2899(4) 0.54206(11) 0.0461(11) Uani 1 1 d . . .
H4A H 0.1490 1.2726 0.5174 0.055 Uiso 1 1 calc R . .
H4B H 0.3664 1.2719 0.5424 0.055 Uiso 1 1 calc R . .
C5 C 0.0846(8) 1.2249(3) 0.57253(11) 0.0411(10) Uani 1 1 d . . .
H5 H -0.0714 1.2140 0.5653 0.049 Uiso 1 1 calc R . .
C6 C 0.1912(9) 1.1114(4) 0.58128(12) 0.0551(13) Uani 1 1 d . . .
H6A H 0.1800 1.0606 0.5598 0.066 Uiso 1 1 calc R . .
H6B H 0.3474 1.1220 0.5872 0.066 Uiso 1 1 calc R . .
C8 C 0.1900(7) 0.9916(4) 0.63451(12) 0.0400(10) Uani 1 1 d . . .
C11 C 0.0663(7) 0.9629(4) 0.66954(11) 0.0388(9) Uani 1 1 d . . .
C13 C 0.1349(8) 0.9111(5) 0.72988(13) 0.0534(13) Uani 1 1 d . . .
C15 C -0.0820(7) 0.9776(4) 0.72684(12) 0.0506(11) Uani 1 1 d . . .
C16 C -0.2361(8) 0.8913(5) 0.70585(13) 0.0598(14) Uani 1 1 d . . .
H16A H -0.2337 0.8168 0.7179 0.072 Uiso 1 1 calc R . .
H16B H -0.3883 0.9191 0.7051 0.072 Uiso 1 1 calc R . .
C17 C -0.1371(8) 0.8845(4) 0.66609(12) 0.0493(12) Uani 1 1 d . . .
H17A H -0.0942 0.8066 0.6598 0.059 Uiso 1 1 calc R . .
H17B H -0.2410 0.9128 0.6474 0.059 Uiso 1 1 calc R . .
C18 C -0.0161(7) 1.0623(4) 0.69482(12) 0.0433(11) Uani 1 1 d . . .
C19 C 0.1703(9) 1.1453(4) 0.70590(14) 0.0631(15) Uani 1 1 d . . .
H19A H 0.2939 1.1028 0.7158 0.095 Uiso 1 1 calc R . .
H19B H 0.1163 1.1975 0.7246 0.095 Uiso 1 1 calc R . .
H19C H 0.2174 1.1877 0.6842 0.095 Uiso 1 1 calc R . .
C20 C -0.2119(8) 1.1318(4) 0.67932(13) 0.0597(14) Uani 1 1 d . . .
H20A H -0.1594 1.1831 0.6602 0.090 Uiso 1 1 calc R . .
H20B H -0.2786 1.1753 0.6992 0.090 Uiso 1 1 calc R . .
H20C H -0.3205 1.0806 0.6688 0.090 Uiso 1 1 calc R . .
C21 C -0.1693(9) 1.0236(5) 0.76314(14) 0.0819(19) Uani 1 1 d . . .
H21A H -0.0642 1.0770 0.7735 0.123 Uiso 1 1 calc R . .
H21B H -0.1911 0.9615 0.7804 0.123 Uiso 1 1 calc R . .
H21C H -0.3085 1.0618 0.7588 0.123 Uiso 1 1 calc R . .
C22 C 0.2816(7) 1.4709(4) 0.61999(10) 0.0368(9) Uani 1 1 d . . .
C23 C 0.2571(8) 1.5845(4) 0.62951(11) 0.0455(11) Uani 1 1 d . . .
H23 H 0.1350 1.6252 0.6206 0.055 Uiso 1 1 calc R . .
C24 C 0.4107(10) 1.6393(4) 0.65215(12) 0.0581(14) Uani 1 1 d . . .
H24 H 0.3916 1.7160 0.6586 0.070 Uiso 1 1 calc R . .
C25 C 0.5933(9) 1.5788(5) 0.66514(12) 0.0592(14) Uani 1 1 d . . .
H25 H 0.6986 1.6155 0.6800 0.071 Uiso 1 1 calc R . .
C26 C 0.6203(9) 1.4651(5) 0.65626(13) 0.0608(14) Uani 1 1 d . . .
H26 H 0.7411 1.4243 0.6657 0.073 Uiso 1 1 calc R . .
C27 C 0.4675(9) 1.4118(4) 0.63335(12) 0.0525(12) Uani 1 1 d . . .
H27 H 0.4884 1.3355 0.6267 0.063 Uiso 1 1 calc R . .
C28 C -0.0850(8) 1.6148(4) 0.54077(11) 0.0408(10) Uani 1 1 d . . .
C29 C -0.2693(9) 1.6466(4) 0.56161(13) 0.0519(12) Uani 1 1 d . . .
H29 H -0.3752 1.5921 0.5682 0.062 Uiso 1 1 calc R . .
C30 C -0.2955(9) 1.7582(4) 0.57248(13) 0.0559(13) Uani 1 1 d . . .
H30 H -0.4198 1.7798 0.5863 0.067 Uiso 1 1 calc R . .
C31 C -0.1383(10) 1.8379(4) 0.56294(13) 0.0555(14) Uani 1 1 d . . .
H31 H -0.1580 1.9140 0.5701 0.067 Uiso 1 1 calc R . .
C32 C 0.0491(10) 1.8072(4) 0.54296(12) 0.0581(13) Uani 1 1 d . . .
H32 H 0.1576 1.8616 0.5375 0.070 Uiso 1 1 calc R . .
C33 C 0.0747(9) 1.6953(4) 0.53111(11) 0.0520(12) Uani 1 1 d . . .
H33 H 0.1976 1.6742 0.5168 0.062 Uiso 1 1 calc R . .
O1 O 0.0988(6) 1.2943(2) 0.60506(7) 0.0504(8) Uani 1 1 d . . .
O34 O -0.2554(5) 1.4105(3) 0.53314(9) 0.0620(10) Uani 1 1 d . . .
O7 O 0.0748(5) 1.0628(2) 0.61318(8) 0.0474(8) Uani 1 1 d . . .
O35 O 0.0247(6) 1.4755(3) 0.48692(7) 0.0620(10) Uani 1 1 d . . .
O9 O 0.3706(6) 0.9532(3) 0.62590(9) 0.0697(11) Uani 1 1 d . . .
O12 O 0.2189(5) 0.9017(3) 0.69426(8) 0.0473(8) Uani 1 1 d . . .
O14 O 0.2242(6) 0.8672(4) 0.75617(9) 0.0786(12) Uani 1 1 d . . .
S1 S -0.0526(2) 1.47301(9) 0.52484(3) 0.0453(3) Uani 1 1 d . . .
 
loop_
 _atom_site_aniso_label
 _atom_site_aniso_U_11
 _atom_site_aniso_U_22
 _atom_site_aniso_U_33
 _atom_site_aniso_U_23
 _atom_site_aniso_U_13
 _atom_site_aniso_U_12
C2 0.034(2) 0.041(2) 0.036(2) -0.0017(18) 0.0018(19) 0.000(2)
C3 0.039(3) 0.038(2) 0.039(2) -0.0022(19) -0.0038(19) -0.006(2)
C4 0.053(3) 0.051(3) 0.034(2) -0.006(2) 0.005(2) -0.001(2)
C5 0.044(3) 0.037(2) 0.043(2) -0.0021(18) 0.001(2) -0.003(2)
C6 0.056(3) 0.049(3) 0.060(3) 0.005(2) 0.021(3) 0.001(2)
C8 0.037(3) 0.041(3) 0.043(2) -0.0058(19) -0.001(2) 0.000(2)
C11 0.025(2) 0.047(2) 0.044(2) -0.001(2) -0.0062(19) 0.001(2)
C13 0.036(3) 0.079(4) 0.046(3) 0.004(3) -0.002(2) -0.007(3)
C15 0.030(2) 0.080(3) 0.042(2) -0.007(2) 0.001(2) 0.002(3)
C16 0.035(3) 0.080(4) 0.065(3) 0.010(3) 0.001(2) -0.014(3)
C17 0.037(3) 0.054(3) 0.057(3) -0.002(2) -0.008(2) -0.006(2)
C18 0.030(2) 0.052(3) 0.048(2) -0.007(2) 0.003(2) -0.001(2)
C19 0.054(4) 0.062(3) 0.073(4) -0.029(3) 0.005(3) -0.011(3)
C20 0.044(3) 0.065(3) 0.071(3) -0.006(3) 0.007(3) 0.015(3)
C21 0.052(3) 0.136(5) 0.057(3) -0.006(4) 0.015(3) 0.003(4)
C22 0.040(2) 0.039(2) 0.030(2) -0.0025(19) 0.0029(18) 0.000(2)
C23 0.051(3) 0.044(3) 0.042(2) -0.005(2) -0.003(2) 0.006(2)
C24 0.081(4) 0.044(3) 0.050(3) -0.011(2) -0.004(3) -0.011(3)
C25 0.055(3) 0.076(4) 0.047(3) -0.005(3) -0.010(3) -0.017(3)
C26 0.053(3) 0.073(4) 0.056(3) 0.002(3) -0.014(2) 0.001(3)
C27 0.053(3) 0.050(3) 0.055(3) -0.004(2) -0.010(3) 0.004(3)
C28 0.042(3) 0.042(2) 0.039(2) 0.0065(18) -0.004(2) -0.007(2)
C29 0.042(3) 0.055(3) 0.059(3) 0.005(2) -0.011(3) -0.004(2)
C30 0.056(3) 0.055(3) 0.057(3) -0.005(2) 0.002(3) 0.002(3)
C31 0.080(4) 0.041(3) 0.045(3) -0.002(2) -0.002(3) -0.002(3)
C32 0.068(4) 0.053(3) 0.053(3) -0.002(2) 0.008(3) -0.019(3)
C33 0.061(3) 0.049(3) 0.046(3) -0.002(2) 0.006(3) -0.007(3)
O1 0.069(2) 0.0431(17) 0.0391(16) 0.0010(13) 0.0078(17) -0.0123(17)
O34 0.046(2) 0.0502(19) 0.090(3) -0.0047(18) -0.0126(19) -0.0176(17)
O7 0.0414(19) 0.0496(18) 0.0512(17) 0.0115(14) 0.0124(16) 0.0079(16)
O35 0.087(3) 0.064(2) 0.0351(16) -0.0039(15) -0.0153(17) 0.003(2)
O9 0.043(2) 0.102(3) 0.064(2) 0.013(2) 0.0157(16) 0.027(2)
O12 0.0307(17) 0.062(2) 0.0494(18) 0.0055(16) -0.0017(14) 0.0052(16)
O14 0.058(2) 0.123(3) 0.055(2) 0.030(2) -0.0136(19) 0.003(2)
S1 0.0499(7) 0.0444(6) 0.0416(5) -0.0010(5) -0.0116(6) -0.0060(6)
 
_geom_special_details
;
 All esds (except the esd in the dihedral angle between two l.s. planes)
 are estimated using the full covariance matrix.  The cell esds are taken
 into account individually in the estimation of esds in distances, angles
 and torsion angles; correlations between esds in cell parameters are only
 used when they are defined by crystal symmetry.  An approximate (isotropic)
 treatment of cell esds is used for estimating esds involving l.s. planes.
;
 
loop_
 _geom_bond_atom_site_label_1
 _geom_bond_atom_site_label_2
 _geom_bond_distance
 _geom_bond_site_symmetry_2
 _geom_bond_publ_flag
C2 O1 1.431(5) . ?
C2 C22 1.512(6) . ?
C2 C3 1.540(5) . ?
C2 H2 0.9800 . ?
C3 C4 1.537(6) . ?
C3 S1 1.782(4) . ?
C3 H3 0.9800 . ?
C4 C5 1.519(5) . ?
C4 H4A 0.9700 . ?
C4 H4B 0.9700 . ?
C5 O1 1.416(4) . ?
C5 C6 1.503(6) . ?
C5 H5 0.9800 . ?
C6 O7 1.450(5) . ?
C6 H6A 0.9700 . ?
C6 H6B 0.9700 . ?
C8 O9 1.213(5) . ?
C8 O7 1.321(5) . ?
C8 C11 1.491(6) . ?
C11 O12 1.457(5) . ?
C11 C17 1.531(6) . ?
C11 C18 1.549(6) . ?
C13 O14 1.195(5) . ?
C13 O12 1.370(5) . ?
C13 C15 1.520(6) . ?
C15 C21 1.495(6) . ?
C15 C16 1.559(6) . ?
C15 C18 1.560(6) . ?
C16 C17 1.538(6) . ?
C16 H16A 0.9700 . ?
C16 H16B 0.9700 . ?
C17 H17A 0.9700 . ?
C17 H17B 0.9700 . ?
C18 C20 1.531(6) . ?
C18 C19 1.532(6) . ?
C19 H19A 0.9600 . ?
C19 H19B 0.9600 . ?
C19 H19C 0.9600 . ?
C20 H20A 0.9600 . ?
C20 H20B 0.9600 . ?
C20 H20C 0.9600 . ?
C21 H21A 0.9600 . ?
C21 H21B 0.9600 . ?
C21 H21C 0.9600 . ?
C22 C23 1.375(6) . ?
C22 C27 1.396(6) . ?
C23 C24 1.382(6) . ?
C23 H23 0.9300 . ?
C24 C25 1.384(7) . ?
C24 H24 0.9300 . ?
C25 C26 1.373(6) . ?
C25 H25 0.9300 . ?
C26 C27 1.376(6) . ?
C26 H26 0.9300 . ?
C27 H27 0.9300 . ?
C28 C29 1.383(7) . ?
C28 C33 1.386(6) . ?
C28 S1 1.759(4) . ?
C29 C30 1.367(6) . ?
C29 H29 0.9300 . ?
C30 C31 1.368(7) . ?
C30 H30 0.9300 . ?
C31 C32 1.379(7) . ?
C31 H31 0.9300 . ?
C32 C33 1.380(6) . ?
C32 H32 0.9300 . ?
C33 H33 0.9300 . ?
O34 S1 1.450(3) . ?
O35 S1 1.429(3) . ?
 
loop_
 _geom_angle_atom_site_label_1
 _geom_angle_atom_site_label_2
 _geom_angle_atom_site_label_3
 _geom_angle
 _geom_angle_site_symmetry_1
 _geom_angle_site_symmetry_3
 _geom_angle_publ_flag
O1 C2 C22 108.8(3) . . ?
O1 C2 C3 106.3(3) . . ?
C22 C2 C3 115.1(4) . . ?
O1 C2 H2 108.8 . . ?
C22 C2 H2 108.8 . . ?
C3 C2 H2 108.8 . . ?
C4 C3 C2 104.7(3) . . ?
C4 C3 S1 109.9(3) . . ?
C2 C3 S1 113.3(3) . . ?
C4 C3 H3 109.6 . . ?
C2 C3 H3 109.6 . . ?
S1 C3 H3 109.6 . . ?
C5 C4 C3 102.7(3) . . ?
C5 C4 H4A 111.2 . . ?
C3 C4 H4A 111.2 . . ?
C5 C4 H4B 111.2 . . ?
C3 C4 H4B 111.2 . . ?
H4A C4 H4B 109.1 . . ?
O1 C5 C6 107.9(4) . . ?
O1 C5 C4 105.7(3) . . ?
C6 C5 C4 112.2(4) . . ?
O1 C5 H5 110.3 . . ?
C6 C5 H5 110.3 . . ?
C4 C5 H5 110.3 . . ?
O7 C6 C5 107.5(4) . . ?
O7 C6 H6A 110.2 . . ?
C5 C6 H6A 110.2 . . ?
O7 C6 H6B 110.2 . . ?
C5 C6 H6B 110.2 . . ?
H6A C6 H6B 108.5 . . ?
O9 C8 O7 123.7(4) . . ?
O9 C8 C11 125.0(4) . . ?
O7 C8 C11 111.2(4) . . ?
O12 C11 C8 107.6(3) . . ?
O12 C11 C17 105.0(3) . . ?
C8 C11 C17 117.7(4) . . ?
O12 C11 C18 102.4(3) . . ?
C8 C11 C18 118.5(4) . . ?
C17 C11 C18 103.8(3) . . ?
O14 C13 O12 121.8(5) . . ?
O14 C13 C15 131.2(5) . . ?
O12 C13 C15 106.9(4) . . ?
C21 C15 C13 115.0(4) . . ?
C21 C15 C16 116.0(4) . . ?
C13 C15 C16 102.3(4) . . ?
C21 C15 C18 119.7(4) . . ?
C13 C15 C18 99.0(3) . . ?
C16 C15 C18 102.0(3) . . ?
C17 C16 C15 104.2(4) . . ?
C17 C16 H16A 110.9 . . ?
C15 C16 H16A 110.9 . . ?
C17 C16 H16B 110.9 . . ?
C15 C16 H16B 110.9 . . ?
H16A C16 H16B 108.9 . . ?
C11 C17 C16 101.8(3) . . ?
C11 C17 H17A 111.4 . . ?
C16 C17 H17A 111.4 . . ?
C11 C17 H17B 111.4 . . ?
C16 C17 H17B 111.4 . . ?
H17A C17 H17B 109.3 . . ?
C20 C18 C19 108.6(4) . . ?
C20 C18 C11 115.6(4) . . ?
C19 C18 C11 112.9(4) . . ?
C20 C18 C15 113.8(4) . . ?
C19 C18 C15 113.4(4) . . ?
C11 C18 C15 91.9(3) . . ?
C18 C19 H19A 109.5 . . ?
C18 C19 H19B 109.5 . . ?
H19A C19 H19B 109.5 . . ?
C18 C19 H19C 109.5 . . ?
H19A C19 H19C 109.5 . . ?
H19B C19 H19C 109.5 . . ?
C18 C20 H20A 109.5 . . ?
C18 C20 H20B 109.5 . . ?
H20A C20 H20B 109.5 . . ?
C18 C20 H20C 109.5 . . ?
H20A C20 H20C 109.5 . . ?
H20B C20 H20C 109.5 . . ?
C15 C21 H21A 109.5 . . ?
C15 C21 H21B 109.5 . . ?
H21A C21 H21B 109.5 . . ?
C15 C21 H21C 109.5 . . ?
H21A C21 H21C 109.5 . . ?
H21B C21 H21C 109.5 . . ?
C23 C22 C27 118.5(4) . . ?
C23 C22 C2 120.3(4) . . ?
C27 C22 C2 121.2(4) . . ?
C22 C23 C24 121.2(5) . . ?
C22 C23 H23 119.4 . . ?
C24 C23 H23 119.4 . . ?
C23 C24 C25 119.2(5) . . ?
C23 C24 H24 120.4 . . ?
C25 C24 H24 120.4 . . ?
C26 C25 C24 120.6(5) . . ?
C26 C25 H25 119.7 . . ?
C24 C25 H25 119.7 . . ?
C25 C26 C27 119.6(5) . . ?
C25 C26 H26 120.2 . . ?
C27 C26 H26 120.2 . . ?
C26 C27 C22 120.9(4) . . ?
C26 C27 H27 119.6 . . ?
C22 C27 H27 119.6 . . ?
C29 C28 C33 120.4(4) . . ?
C29 C28 S1 120.9(3) . . ?
C33 C28 S1 118.7(4) . . ?
C30 C29 C28 120.0(5) . . ?
C30 C29 H29 120.0 . . ?
C28 C29 H29 120.0 . . ?
C29 C30 C31 119.8(5) . . ?
C29 C30 H30 120.1 . . ?
C31 C30 H30 120.1 . . ?
C30 C31 C32 121.0(5) . . ?
C30 C31 H31 119.5 . . ?
C32 C31 H31 119.5 . . ?
C33 C32 C31 119.6(5) . . ?
C33 C32 H32 120.2 . . ?
C31 C32 H32 120.2 . . ?
C32 C33 C28 119.2(5) . . ?
C32 C33 H33 120.4 . . ?
C28 C33 H33 120.4 . . ?
C5 O1 C2 110.4(3) . . ?
C8 O7 C6 116.4(3) . . ?
C13 O12 C11 106.8(3) . . ?
O35 S1 O34 118.4(2) . . ?
O35 S1 C28 108.8(2) . . ?
O34 S1 C28 108.3(2) . . ?
O35 S1 C3 107.1(2) . . ?
O34 S1 C3 108.7(2) . . ?
C28 S1 C3 104.72(19) . . ?
 
_diffrn_measured_fraction_theta_max    0.998
_diffrn_reflns_theta_full              74.21
_diffrn_measured_fraction_theta_full   0.998
_refine_diff_density_max    0.279
_refine_diff_density_min   -0.354
_refine_diff_density_rms    0.061

#===END
